# Supplementary material
Source: HighWire-hosted journal article supplement (https://bmjopen.bmj.com/content/10/2/e030371)
Supplement: inline-supplementary-material-1 [file inline-supplementary-material-1.pdf]

Supplementary File 1. Search strategy - Medline

1. patient isolation.mp. or exp Patient Isolation/
2. exp Cross Infection/ or contact isolation.mp.
3. respiratory isolation.mp.
4. source isolation.mp.
5. contact isolation.mp.
6. droplet precautions.mp.
7. airborne precautions.mp.
8. contact precautions.mp.
9. cubicle.mp.
10. mrsa.mp. or exp Methicillin-Resistant Staphylococcus aureus/
11. 1 or 2 or 3 or 4 or 5 or 6 or 7 or 8 or 9 or 10
12. patient safety.mp. or exp Patient Safety/
13. patient harm.mp. or exp Patient Harm/
14. depression.mp. or exp DEPRESSION/
15. exp ANXIETY/ or anxiety.mp.
16. adaptation.mp. or exp ADAPTATION, PSYCHOLOGICAL/
17. exp STRESS, PSYCHOLOGICAL/ or stress.mp.
18. patient satisfaction.mp. or exp Patient Satisfaction/
19. quality of life.mp. or exp "Quality of Life"/
20. 12 or 13 or 14 or 15 or 16 or 17 or 18 or 19 or 20
21. 11 and 20
